# Supplementary material for: Fibrotic Lung Disease Alters Neutrophil Trafficking and Promotes Neutrophil Elastase and Extracellular Trap Release
Source: PubMed Central journal article supplement (PMC10542701; doi:10.4049/immunohorizons.2200083), 2022-12-01
Supplement: NIHMS1932051-supplement-Supplemental_data.pdf [file NIHMS1932051-supplement-Supplemental_data.pdf]

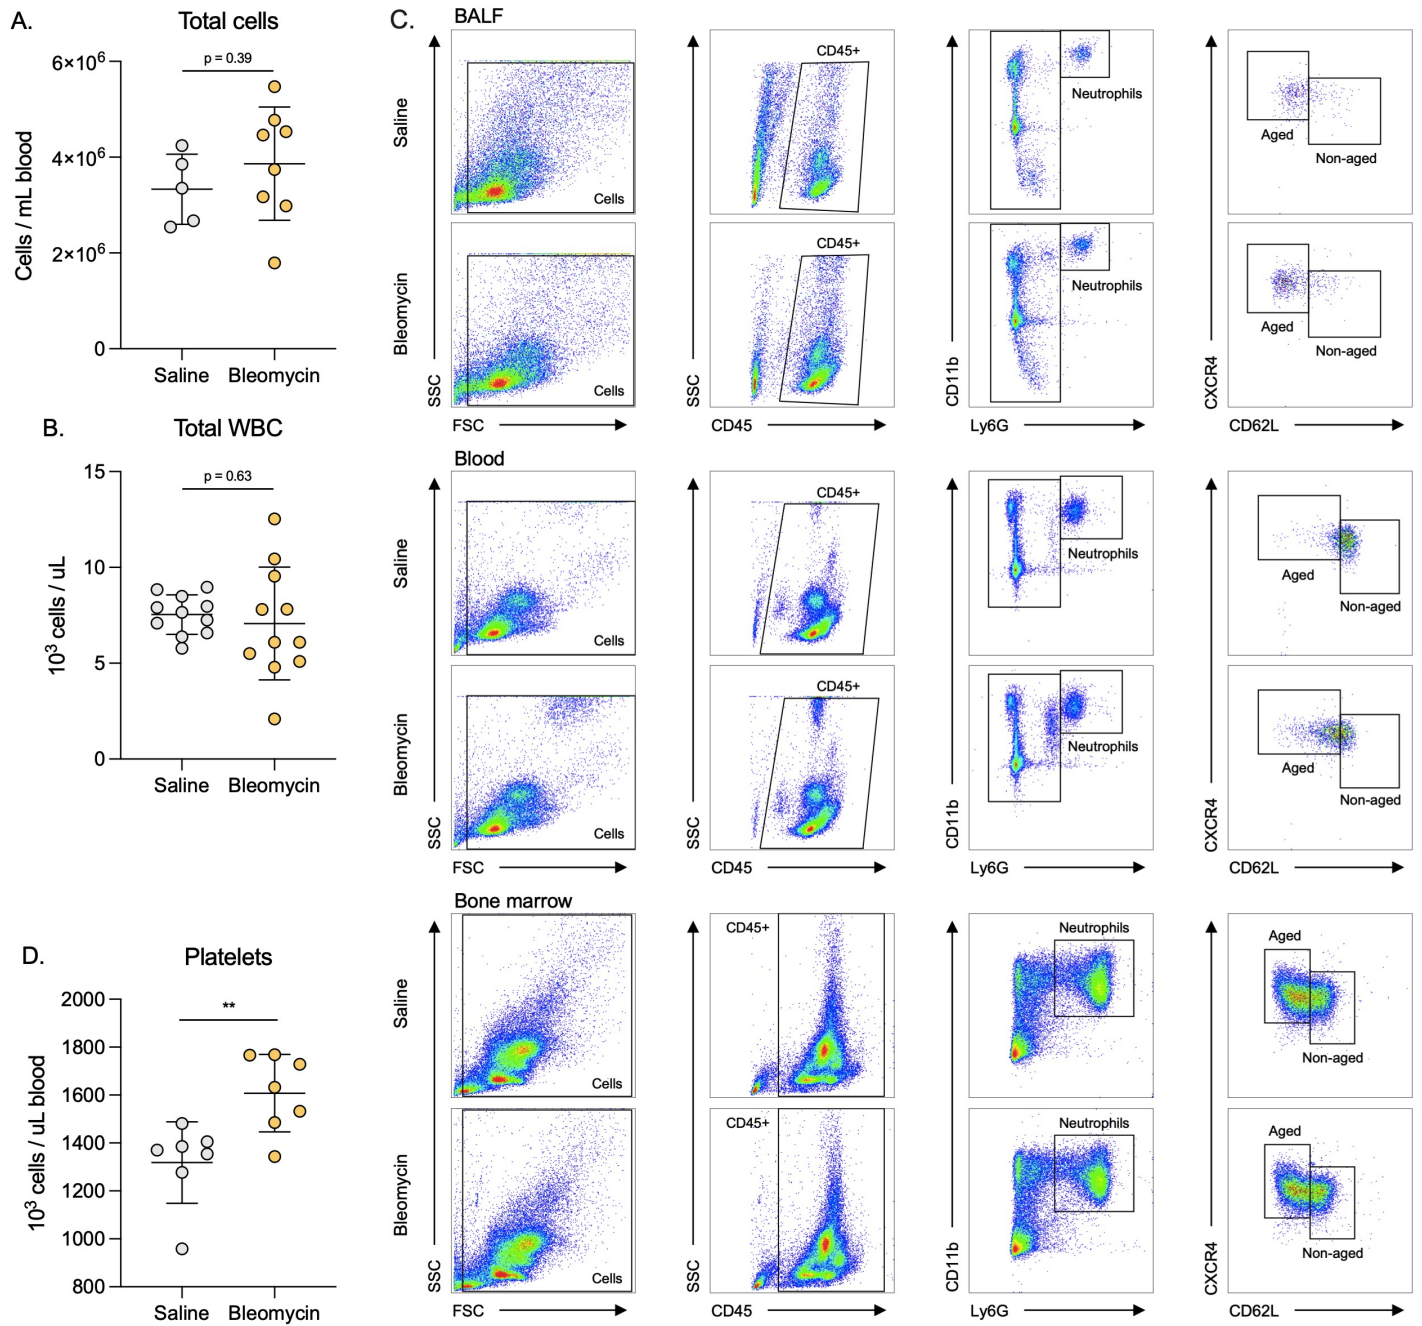

**Supplemental Figure 1: No difference in total WBC numbers in fibrotic mice.** **A.** Cells were collected from blood and quantified via flow cytometry. WBCs were gated as all CD45<sup>+</sup> cells. N = 5-8 mice per group. Data representative of >2 independent experiments. **B.** Whole blood was collected in EDTA tubes for complete blood count. WBC quantification is represented as absolute number. N = 11 mice per group. Data from 3 combined experiments. **C.** Identification of aged and non-aged neutrophils via flow cytometry from BALF, blood, and bone marrow isolated from saline and bleomycin-treated mice. **D.** Absolute number of platelets as measured by CBC on whole blood from fibrotic and nonfibrotic mice. N = 7 mice per group. Data from 2 combined experiments. For A-B and D: statistical analysis by unpaired Student's t test; error bars represent the means  $\pm$  SD.

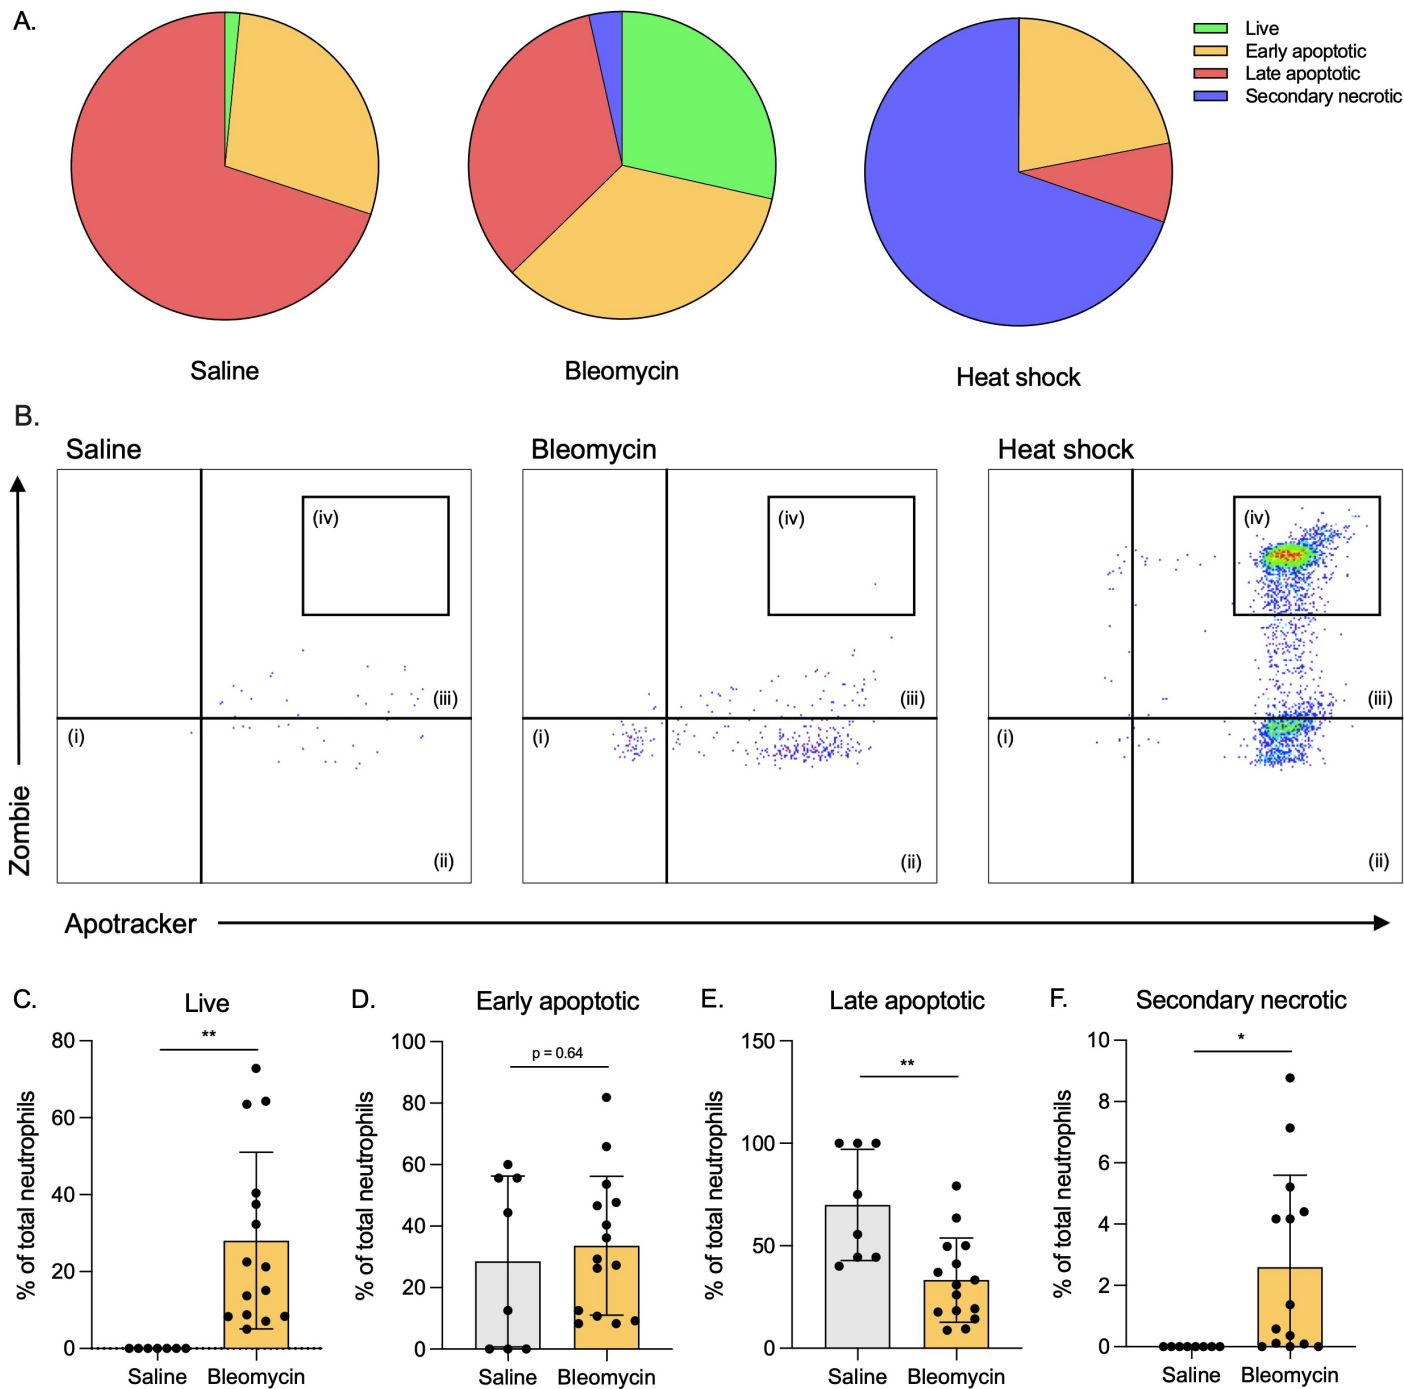

**Supplemental Figure 2: Neutrophils in airspaces of fibrotic mice have features of apoptosis resistance and frank necrosis.** **A.** Cells were collected from BALF of saline or bleomycin-treated mice and live, early apoptotic, late apoptotic, and secondary necrotic neutrophils were measured via flow cytometry. Combined cells from saline and bleomycin-treated mice were heat-shocked at 65°C for 5 minutes as a positive control for cell death. **B.** Representative gating scheme of live/dead neutrophil staining. Live cells are Apotracker<sup>-</sup> Zombie<sup>-</sup> (i), early apoptotic cells are Apotracker<sup>+</sup> Zombie<sup>-</sup> (ii), late apoptotic cells are Apotracker<sup>+</sup> Zombie<sup>lo</sup> (iii), and secondary necrotic cells are Apotracker<sup>+</sup> Zombie<sup>hi</sup> (iv). **C-F.** Quantification of live (C), early apoptotic (D), late apoptotic (E), and secondary necrotic (F) BALF neutrophils from saline or bleomycin-treated mice. Cells were gated as described in B. N = 6-15 mice per group. Data from two combined experiments. Statistical analysis by unpaired Student's t test. Error bars represent the means ± SD.

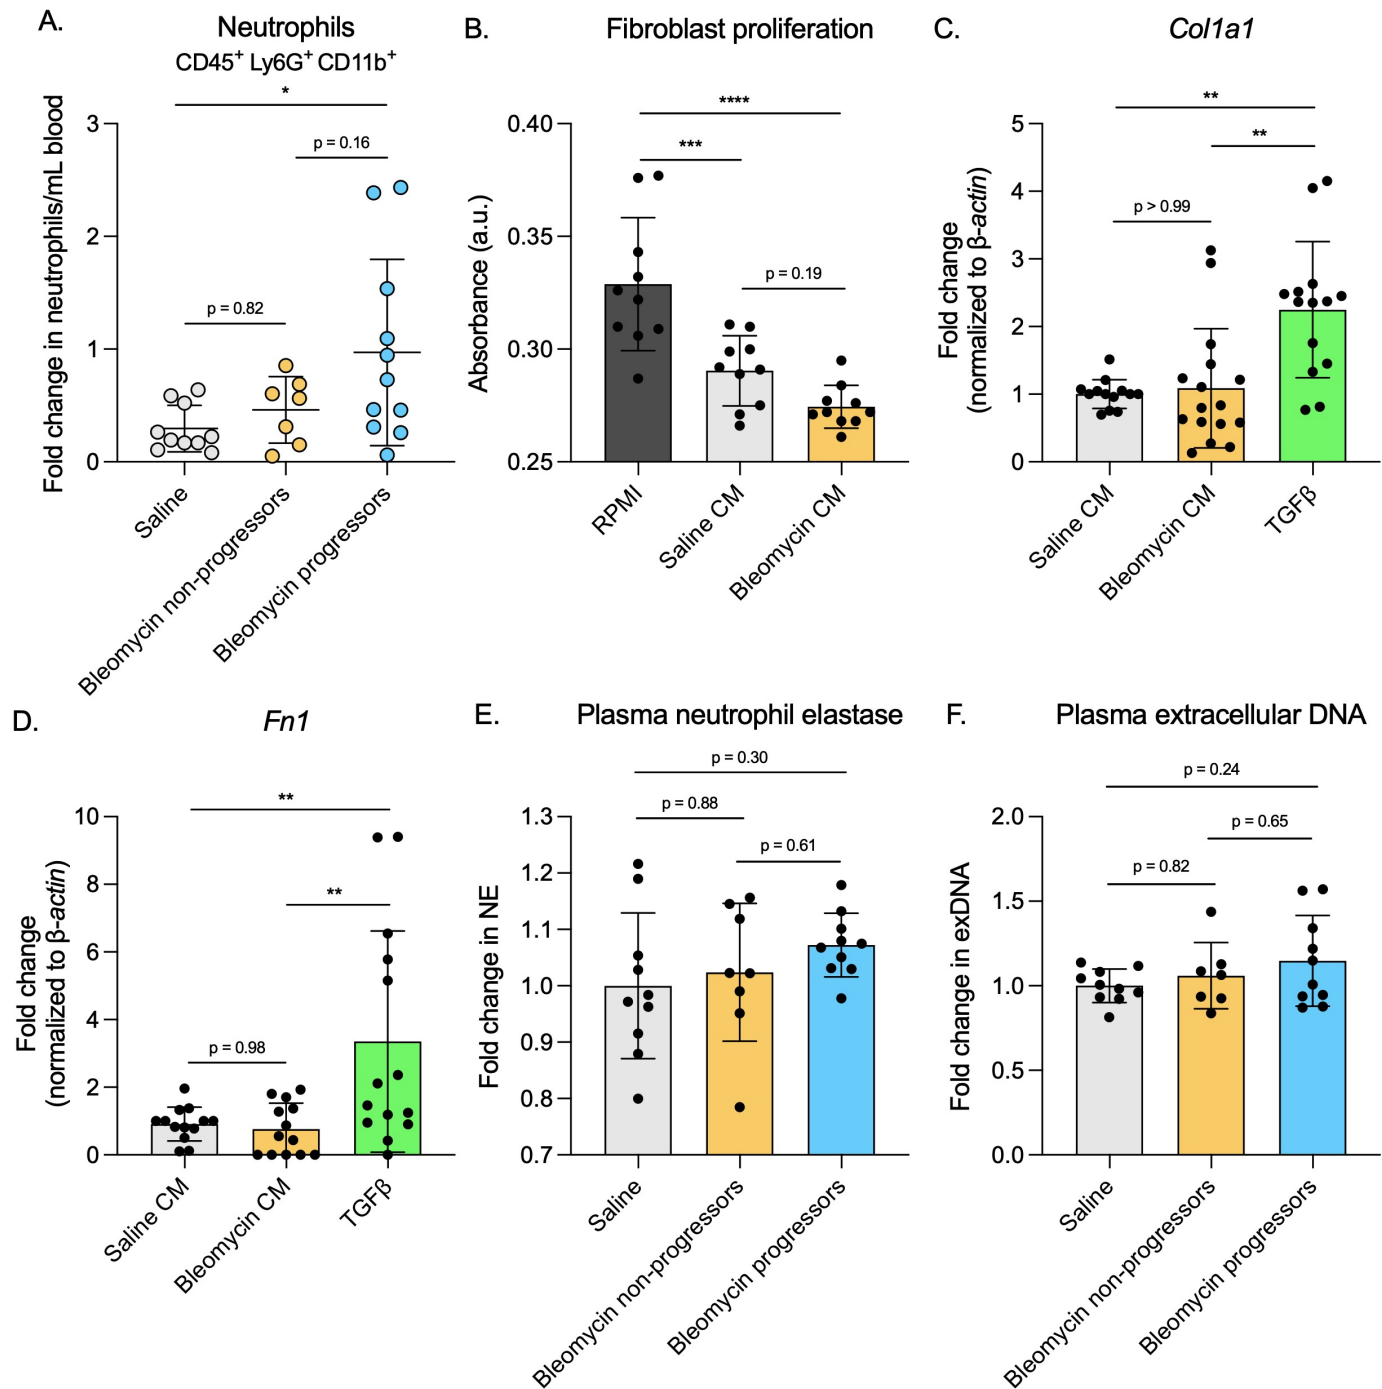

**Supplemental Figure 3: No increase in absolute blood neutrophil number or plasma neutrophil products in bleomycin progressor group.** **A.** Cells were collected from blood and stained for neutrophil markers CD45, CD11b, and Ly6G. Neutrophils were quantified using flow cytometry. N = 7-11 mice per group. Data from two combined experiments. Statistical analysis by one-way ANOVA with Tukey's multiple comparisons; error bars represent the means  $\pm$  SD. **B.** Fibroblast proliferation as measured by MTT assay. MTT reagent was added to fibroblasts after 24 hours of culture. After 48 hours of culture, proliferation was measured. Representative of 3 independent experiments. N = 1 mouse per group, dots represent technical replicates. Statistical analysis by one-way ANOVA. **C-D.** Fibroblast expression of *Colla1* (B) and *Fn1* (C) as measured by RT-qPCR following treatment with supernatant from cultured neutrophils isolated from fibrotic (bleomycin CM) or nonfibrotic (saline CM) mice. Neutrophils were cultured *ex vivo* for 4 hours in plain RPMI, after which, supernatant was removed for assays. Fibroblasts were cultured for in complete RPMI or saline and bleomycin CM + BSA + L-glutamine + penicillin/streptomycin + amphotericin. Data from 3 combined experiments. N = 3 mice per group, dots represent technical replicates. Statistical analysis by Kruskal-Wallis test (B) or one-way ANOVA with multiple comparisons (C). **E-F.** NE (E) and exDNA (F) levels in plasma collected from mice described in Figure 6. N = 7-10 mice per group. Data from two combined experiments. Statistical analysis by one-way ANOVA with Tukey's multiple comparisons; error bars represent the means  $\pm$  SD.

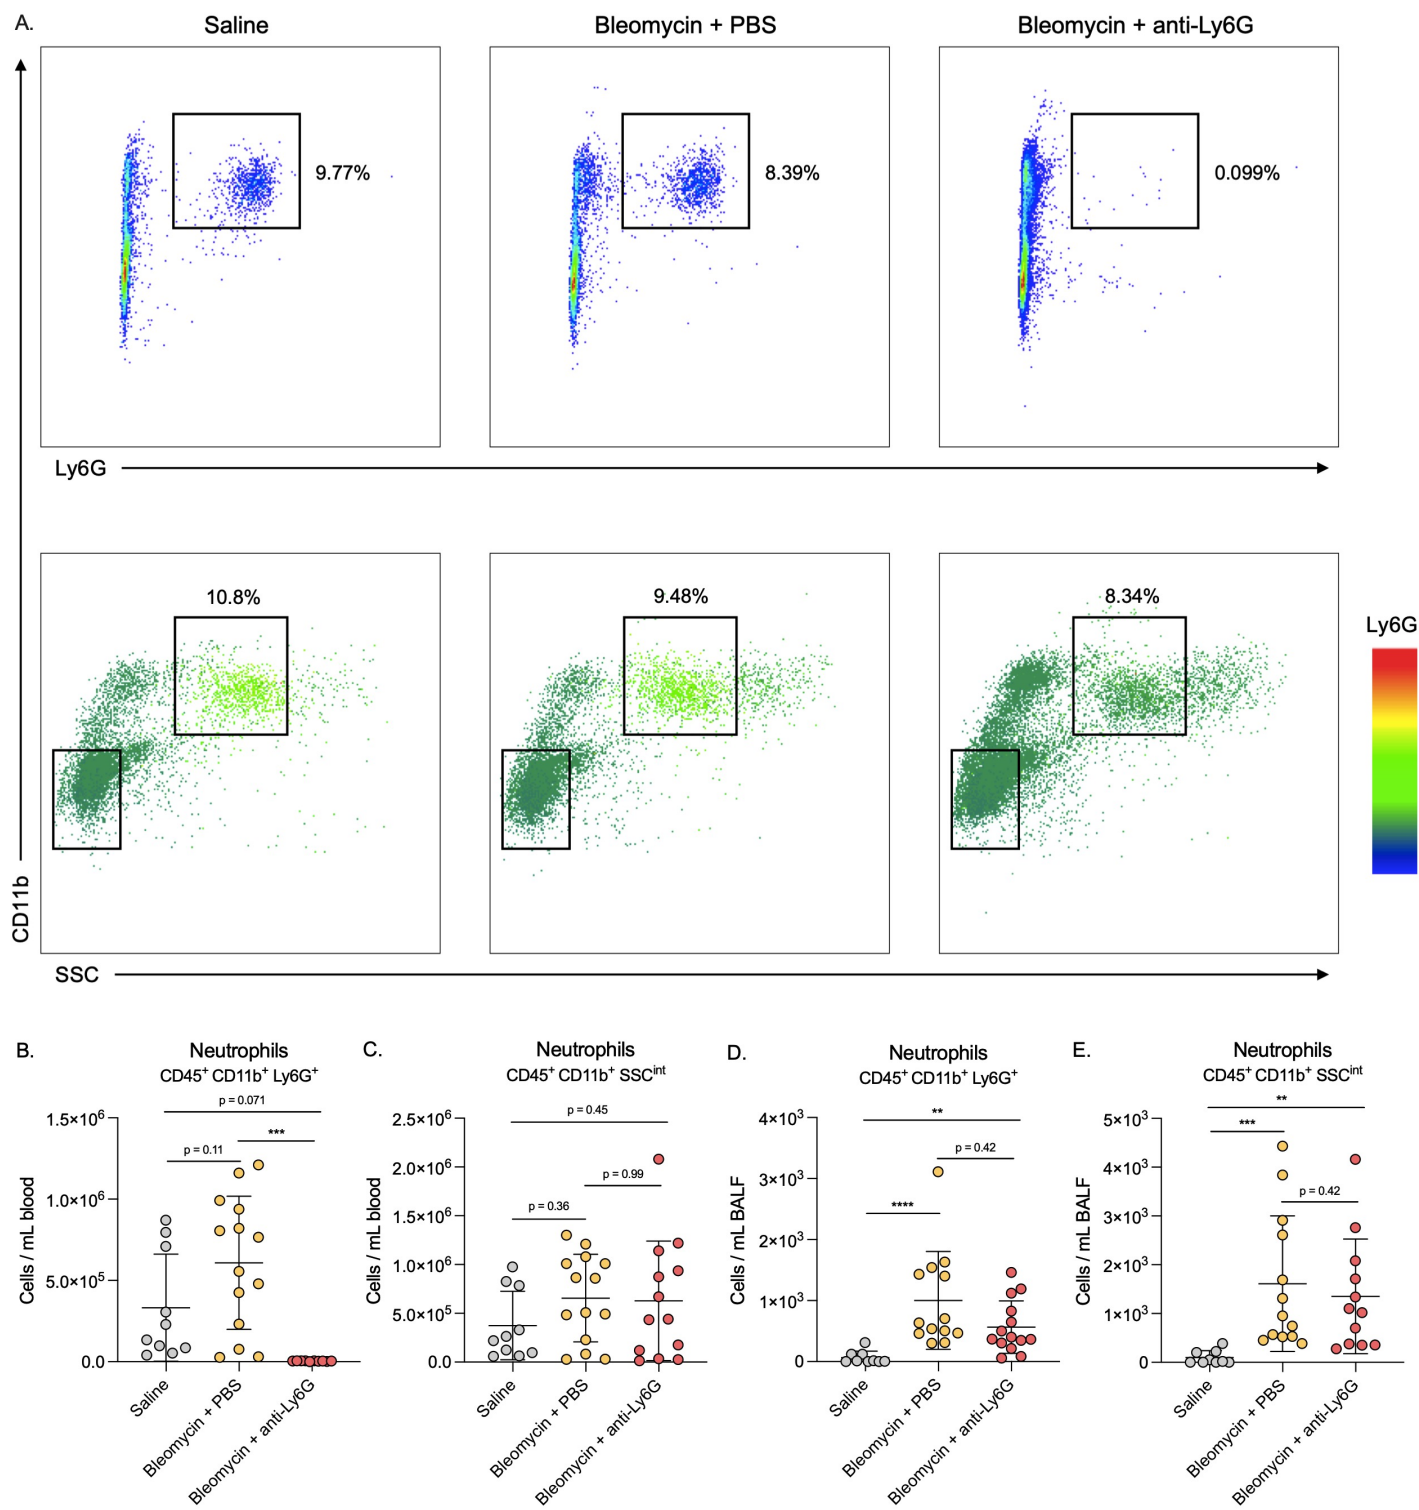

**Supplemental Figure 4: Anti-Ly6G treatment does not deplete neutrophils in fibrotic mice.** **A.** Neutrophils from saline, bleomycin + PBS, and bleomycin + anti-Ly6G-treated mice as gated by CD11b and Ly6G or CD11b and SSC. Heat map shows relative expression of Ly6G. **B.** Neutrophils from blood of mice described in A, identified by gating on CD11b<sup>+</sup> and Ly6G<sup>+</sup> cells. **C.** Neutrophils from blood of mice described in A, identified by gating on CD11b<sup>+</sup> SSC<sup>int</sup> cells. **D.** Neutrophils from BALF quantified as described in B. **E.** Neutrophils in BALF quantified as described in C. For all: N = 10-14 mice per group. Data from two combined experiments; error bars represent the means  $\pm$  SD. For B-C: Statistical analysis by one-way ANOVA with Tukey's multiple comparisons. For D-E: Statistical analysis by Kruskal-Wallis test with Dunn's multiple comparisons.
